# Supplementary material
Source: PubMed Central journal article supplement (PMC6905498)
Supplement: DC182149SupplementaryData.pdf [file DC182149SupplementaryData.pdf]

SUPPLEMENTARY DATA

**Improved Glycemic Variability and Increased Time in Range with Sotagliflozin in Combination with Insulin in Adults with Type 1 Diabetes: A Pooled Analysis of 24-Week Continuous Glucose Monitoring Data from the inTandem Program**

Thomas Danne, Bertrand Cariou, John B. Buse, Satish K. Garg, Julio Rosenstock, Phillip Banks, Jake A. Kushner, Darren K. McGuire, Anne L. Peters, Sangeeta Sawhney, and Paul Strumph

## SUPPLEMENTARY DATA

### **inTandem1 Principal Investigators List**

Andrew Ahmann, Oregon Health & Science University, Portland, OR, USA; Buki Ajala, LMC Diabetes and Endocrinology, Calgary, Alberta, Canada; Laura Akright, Northeast Endocrinology Associates, PA, Schertz, TX, USA; Amer Al-Karadsheh, The Endocrine Center Research Consultants, Houston, TX, USA; Hani Alasaad, LMC Diabetes and Endocrinology, Barrie, Ontario, Canada; Stephen Aronoff, Research Institute of Dallas, Dallas, TX, USA; Ronnie Aronson, LMC Diabetes and Endocrinology, Toronto, Ontario, Canada; Timothy Bailey, AMCR Institute, Inc., Escondido, CA, USA; Arti Bhan, Henry Ford Hospital, Detroit, MI, USA; Bruce Bode, Atlanta Diabetes Associates, Atlanta, GA, USA; John Buse, UNC Health Care System, Chapel Hill, NC, USA; Tira Chaica Brom, Texas Diabetes and Endocrinology, Austin, TX, USA; Mark Christiansen, Diablo Clinical Research, Walnut Creek, CA, USA; Elena Christofides, Endocrinology Associates, Inc, Columbus, OH, USA; Jay Cohen, The Endocrine Clinic, PC, Memphis, TN, USA; Thomas Elliott, Vancouver General Hospital, Vancouver, BC, Canada; Norman Fishman, Diabetes Endocrinology Specialists, Inc., Chesterfield, MO, USA; David Fitz-Patrick, East-West Medical Research Institute, Honolulu, HI, USA; Juan Pablo, Frias, National Research Institute, Los Angeles, CA, USA; Satish Garg, Barbara Davis Center, University of Colorado Denver, Aurora, CO, USA; W. Timothy Garvey, University of Alabama at Birmingham, Birmingham, AL, USA; Linda Gaudiani, Marin Endocrine Care and Research, Inc., Greenbrae, CA, USA; Gregg Gerety, AMC Division of Community Endocrinology, Albany, NY, USA; Ronald Goldenberg, LMC Diabetes and Endocrinology, Thornhill, Ontario, Canada; Carl Griffin, Lynn Health Science Institute (LHSI), Oklahoma City, OK, USA; Yehuda Handelsman, Metabolic Institute of America, Tarzana, CA, USA; Priscilla Hollander, Baylor Endocrine Center, Dallas, TX, USA; Barry Horowitz, Metabolic Research Institute, Inc., West Palm Beach, FL, USA; Irene Hramiak, St. Joseph's Health Care, London, Ontario, Canada; David Huffman, University Diabetes & Endocrine Consultants, Chattanooga, TN, USA; Michael Jardula, Desert Oasis Healthcare Medical Group, Palm Springs, CA, USA; Erin Keely, Ottawa Hospital, Riverside Campus, Ottawa, Ontario, Canada; Leslie Klaff, Rainier Clinical Research Center, Renton, WA, USA; David Klonoff, Mills-Peninsula Health Services, San Mateo, CA, USA; Wendy Lane, Mountain Diabetes and Endocrine Center, Asheville, NC, USA; James Larocque, Virginia Endocrinology Research, Chesapeake, VA, USA; Philip Levin, Model Clinical Research, Baltimore, MD, USA; Carol Levy, Icahn School of Medicine at Mount Sinai, New York, NY, USA; William Litchfield, Desert Endocrinology, Henderson, NV, USA; Kathryn Lucas, Diabetes & Endocrinology Consultants, Morehead City, NC, USA; Ivy-Joan Madu, Diabetes Associates Medical Group, Orange, CA, USA; Hiralal Maheshwari, Midwest Endocrinology, Crystal Lake, IL, USA; Ronald Mayfield, Mountainview Clinical Research, Greer, SC, USA; Janet McGill, Washington University School of Medicine in St. Louis, St. Louis, MO, USA; Wendell Miers, Kentucky Diabetes Endocrinology Center, Lexington, KY, USA; Frank Mikell, Springfield Diabetes and Endocrine Center, Springfield, IL, USA; Samer Nakhle, Palm Medical Group, Las Vegas, NV, USA; Ola Odugbesan, Physicians Research Associates, LLC, Lawrenceville, GA, USA; Rakesh Patel, Endocrine and Psychiatry Center, Houston, TX, USA; Athena Philis-Tsimikas, Scripps Whittier Diabetes Institute, La Jolla, CA, USA; Antonio Pinero-Pilona, Suncoast Clinical Research, New Port Richey, FL, USA; David Podlecki, IMMUNOe International Research Centers, Longmont, CO, USA; Zubin Punthakee, McMaster University, Hamilton, Ontario, Canada; Remi Rabasa-Lhoret, Institut de Recherches Cliniques de Montréal (IRCM), Montreal, Quebec, Canada; Thomas Ransom, Nova Scotia Health Authority, Halifax, Nova Scotia, Canada; John Reed, Endocrine Research Solutions, Inc., Roswell, GA, USA; Michael Reeves, Private Practice, Chattanooga, TN, USA; Marc Rendell, Creighton University Medical Center, Omaha, NE, USA; Thomas Repas, Regional Health Clinical Research, Rapid City, SD, USA; Paul Rosenblit, Diabetes Lipid Management and Research Center, Huntington Beach, CA, USA; Julio Rosenstock, Dallas Diabetes and Endocrine Center, Dallas, TX, USA; Katarzyna Sadurska, Eastern Maine Medical Center, Bangor, ME, USA; Senan Sultan, East Coast Institute for Research, Fleming Island, FL, USA; David Sutton, Northeast Florida Endocrine & Diabetes Associates, Jacksonville, FL,

## SUPPLEMENTARY DATA

USA; James Thrasher, Medical Investigations, Inc., Little Rock, AR, USA; Elena Toschi, Joslin Diabetes Center, Boston, MA, USA; Subbulaxmi Trikudanathan, University of Washington Medical Center, Seattle, WA, USA; Shyjauddin Valika, Associates in Endocrinology, Elgin, IL, USA; Joanna Van, Diabetes Research Center, Tustin, CA, USA; Arnold Vera, Peninsula Research Inc., Ormond Beach, FL, USA; Khurram Wadud, East Coast Institute for Research, Jacksonville, FL, USA; Michelle Welch, Diabetes and Metabolism Specialists, San Antonio, TX, USA; Vincent Woo, Diabetes Research Group, Winnipeg, Manitoba, Canada; Alan Wynne, Cotton-O'Neil Clinical Research Center, Topeka, KS, USA; Zeina Yared, LMC Diabetes and Endocrinology, Ville Saint-Laurent, Quebec, Canada

### **inTandem2 Principal Investigators List**

Pascale Abrams, Sint-Vincentiusziekenhuis, Antwerpen, Belgium; Mazin Alhakim, EB Flevoresearch BV, Almere, Netherlands; Jean-Michel Andrieu, Centre Hospitalier de Béziers, Beziers, France; Emiliya Apostolova, MHAT “Bratan Shukerov” AD, Department of Endocrinology, Smolyan, Bulgaria; Kristina Baltramonaitiene, JSC “Kristavita,” Jonava, Lithuania; Lina Barsiene, JSC “Saules Seimos Medicinos Centras,” Kaunas, Lithuania; Thomas Behnke, Diabetes Competence Center Neuwied, Neuwied, Germany; Oľga Beňušová, BENROD, s.r.o., Diabetologická ambulancia, Štúrovo, Slovakia; Geremia Brunetto Bolli, Ospedale Santa Maria della Misericordia, Perugia, Italy; James Boyle, Glasgow Clinical Research Facility, Glasgow, United Kingdom; Michael Brändle, KS St. Gallen Klinik für Endokrinologie, Diabetologie, Osteologie und Stoffwechselerkrankungen, St. Gallen, Switzerland; Helmut Brath, Ordination, Vienna, Austria; Bertrand Cariou, CHU de Nantes Hôpital Guillaume & René Laennec CIC Endocrino-Nutrition, Nantes, France; Martin Clodi, Konventhospital der Barmherzigen Brüder, Abteilung für Innere Medizin, Linz, Austria; Silviana Constantinescu, Medcon S.R.L., Buzau, Romania; Peter Coremans, AZ Nikolaas, SINT-NIKLAAS, Belgium; Carmen Crisan, SC MEDIAB SRL, Targu Mures, Romania; Dominik Dahl, Gemeinschaftspraxis fuer Innere Medizin, Hamburg, Germany; Thomas Danne, Diabeteszentrum für Kinder und Jugendliche Kinder- und Jugendkrankenhaus auf der Bult, Hannover, Germany; Melanie Davies, University Hospitals of Leicester NHS Trust Leicester Diabetes Centre, Leicester, United Kingdom; Christophe De Block, UZ Antwerpen, Edegem, Belgium; Carmen De La Cuesta Mayor, Clinica Nuevas Tecnologias, Sevilla, Spain; Harold de Valk, University Medical Center Utrecht, Utrecht, Netherlands; Corinne DeBroye, UZ Brussel, Brussel, Belgium; Stefano Del Prato, Azienda Ospedaliero Universitaria Pisana—Stabilimento di Cisanello, Pisa, Italy; Aleksı Delchev, Multifprofile Hospital for Active Treatment—Prof. Dr. Paraskev Stoyanov AD, Lovech, Bulgaria; Frank Dellanna, DaVita Clinical Research Deutschland GmbH, Duesseldorf, Germany; Maurizio Di Mauro, AOU Policlinico-Vittorio Emanuele—Centro Diabetologico, Catania, Italy; Viera Doničová, HUMAN-CARE, s.r.o., Diabetologická a metabolická ambulancia, Kosice, Slovakia; Mihaly Dudas, Békés Megyei Pándy Kálmán Korhaz, Gyula, Hungary; Santiago Duran, HUS Virgen de Valme, Sevilla, Spain; Jaroslav Fábry, DIAFA, s.r.o., Diabetologická ambulancia, Bratislava, Slovakia; Peter Fasching, Wilhelminenspital, Vienna, Austria; Juan Carlos Ferrer, Hospital General de Valencia, Valencia, Spain; Migle Francaite-Daugeliene, JSC “Klinikiniai sprendimai,” Alytus, Lithuania; Edward Franek, Centralny Szpital MSW, Warszawa, Poland; Pieter Gillard, UZ Leuven, Leuven, Belgium; Carla Giordano, AOU Policlinico Paolo Giaccone di Palermo—Endocrinologia e Malattie Metaboliche, Palermo, Italy; Ramon Gomis de Barbara, Hospital Clinic de Barcelona, Barcelona, Spain; Peter Grant, Leeds Teaching Hospital NHS Trust, The LIGHT Laboratories, Leeds, United Kingdom; Elwira Gromniak, Indywidualna Specjalistyczna Praktyka Lekarska dr n. med., Szczecin, Poland; Andrea Grosz, Budai Irgalmasrendi Korhaz, Budapest, Hungary; Simon Heller, Sheffield Teaching Hospitals NHS Foundation Trust, Northern General Hospital, Sheffield, United Kingdom; Adriana Ilavská, Medispektrum s.r.o., Diabetologická ambulancia, Bratislava, Slovakia; Andrew Johnson, Clinical Research Centre, North Bristol NHS Trust, Southmead Hospital, Bristol, United Kingdom; Małgorzata Józefowska, Centrum Terapii Współczesnej J.M.

## SUPPLEMENTARY DATA

Jasnorzewska Spółka Komandytowo-Akcyjna, Łódź, Poland; Katarzyna Jusiak, Centrum Medyczne AMED, Warszawa, Poland; Neli Klyuchkova, Diagnostic-Consultative Centre “Equita” EOOD, Varna, Bulgaria; Shlomit Koren Spiegelstein, Assaf Harofeh Medical Center, Tzrifin, Israel; Ewa Krzyżagórska, Praktyka Lekarska Ewa Krzyżagórska, Poznań, Poland; Zohar Landau, Wolfson Medical Center, Holon, Israel; Georgi Levterov, Multiprofile Hospital for Active Treatment, Kaspela EOOD, Plovdiv, Bulgaria; Bernhard Ludvik, Krankenhaus Rudolfstiftung, Vienna, Austria; Angel Marinchev, Multiprofile Hospital for Active Treatment “Sveta Anna” Sofia AD, Sofia, Bulgaria; Nicoleta Mihaela Mindrescu, Nicodiab S.R.L., Bucuresti, Romania; Mariola Minkina-Pędras, CARE CLINIC Sp.z o.o., Katowice, Poland; Cristina Victoria Mistodie, CMI Dr. Mistodie Cristina Victoria, Galati, Romania; Mitko Mitkov, UMHAT “Sveti Georgi” EAD, Clinic of Endocrinology and Metabolic Diseases, Plovdiv, Bulgaria; Cristobal Morales, Hospital Virgen Macarena, Sevilla, Spain; Ofri Mosenzon, Hadassah University Medical Center, Jerusalem, Israel; Alina Mot, S.C. Gensan S.R.L. Policlinica Astra, SIBIU, Romania; Judit Nádas, Bajcsy-Zsilinszky Hospital 3rd Medical Department, Budapest, Hungary; Valerica Nafornta, SC Minimed SRL—Diabet Zaharat, Nutritie si Boli Metabolice, Bacau, Romania; Partheepan Narendaren, University Hospitals Birmingham NHS Foundation Trust, Queen Elizabeth Hospital, Birmingham, United Kingdom; Tamas Oroszlan, Zala County Hospital, Zalaegerszeg, Hungary; Attila Pálkás, Csongrád Megyei Egészségügyi Ellátó Központ, Hodmezovasarhely, Hungary; Ewa Pańkowska, Instytut Diabetologii Sp. z o.o., Warszawa, Poland; Bjoern Paschen, Diabetologische Schwerpunktpraxis Harburg, Hamburg, Germany; Marlena Pascu, S.C. Nutrilife S.R.L., Bucuresti, Romania; Andreas Pfützner, Pfützner Science & Health Institute, Diabeteszentrum & Praxis, Mainz, Germany; Moshe Phillip, Schneider Children's Medical Center of Israel, Petah Tikva, Israel; Orit Pinhas-Hamiel, Sheba Medical Center, Tel Hashomer, Israel; Radovan Plášil, IRIDIA, s.r.o., Diabetologická ambulancia, Vrutky, Slovakia; Paolo Pozzilli, Università Campus Bio-Medico di Roma, Rome, Italy; Rudolf PRAGER, Krankenhaus Hietzing, Vienna, Austria; Camelia Pruna, SC Grandmed SRL, Oradea, Romania; Irina Purtokaite Labutiniene, Klaipeda University Hospital, Klaipeda, Lithuania; Miguel Quesada, Hospital Clinico San Cecilio, Granada, Spain; Shenaz Ramtoola, East Lancashire Hospitals NHS Trust, Royal Blackburn Hospital, Blackburn, United Kingdom; Margarita Rivas, Hospital Infanta Luisa, Sevilla, Spain; Michel Rodier, CHU de Nîmes, Centre Hospitalier Universitaire Caremeau, Nîmes, France; Ludger Rose, Institut fuer Diabetesforschung Muenster GmbH, Muenster, Germany; Staffan Salmonsson, Öbackakliniken, Härnösand, Sweden; Ildiko Sasvari, Egeszsegugyi Kospont Szakrendelő Intézet II. em 21., Budapest, Hungary; Marina Scavini, IRCCS Ospedale San Raffaele, Milan, Italy; Mariette Schoofs, Albert Schweitzer Hospital, Dordrecht, Netherlands; Naim Shehadeh, Rambam Health Care Campus, Haifa, Israel; Rafael Simo, Hospital De La Vall D'herbron, Barcelona, Spain; Ewa Skokowska, NZOZ Przychodnia Specjalistyczna Medica, Lublin, Poland; Antoanela Slavcheva Petrova—Gancheva, MHAT-Ruse AD, Second Department of Internal Diseases, Ruse, Bulgaria; Albert Szocs, Szocs Depot Kft., Budapest, Hungary; Bengt-Olov Tengmark, Citydiabetes, Stockholm, Sweden; Miriam Teplanová, FUNKYSTUFF, s.r.o., Diabetologická ambulancia, Nové Zámky, Slovakia; Ingemar Thorstensson, Medicinklinikens Forskningsenhet, Kristianstad, Sweden; Francisco Tinahones, Hospital General Universitario de Málaga-Hospital Virgen de la Victoria, Malaga, Spain; Lidia Tokarska, LANDA—Specjalistyczne Gabinety Lekarski, Kraków, Poland; Leonas Valius, Hospital of Lithuanian University of Health Sciences Kaunas Klinikos, Kaunas, Lithuania; Bruno Verges, CHU du Bocage, Dijon, France; Peter Voros, Fővárosi Önkormányzat Egyesített Szent István és Szent László Kórház—Rendelőintézet, II. Belgyógyászati Osztály, Budapest, Hungary; Julio Wainstein, Diabetes Medical Center, Tel Aviv, Israel

## SUPPLEMENTARY DATA

### Procedure for Assessment of Postprandial Glucose

A 2-hour postprandial glucose (PPG) sample was obtained after a standardized mixed meal (1; 2) on day 1 and at the week 24 visit (or earlier for patient terminating study participation before week 24) in continuous glucose monitoring (CGM) substudy participants. Patients with hypersensitivity or dietary restrictions to the contents of the standardized mixed meal omitted it, and the reason for omission was recorded in source documents.

For both the day 1 and week 24 scheduled mixed meal, patients took their usual/prescribed basal insulin before coming to the site for the visit. Patients did not to take any short-acting (bolus) insulin on the day of the mixed meal until instructed to do so by study staff.

The last dose of single-blind placebo was administered on the day prior to day 1. The first dose of double-blind study drug on day 1 of the standardized mixed meal was given after completion of the 2-hour PPG collection. For the week 24 standardized mixed meal, the patient took the dose of double-blind study drug immediately after the fasting blood samples were obtained and bolus insulin was administered, and approximately 15 minutes before ingestion of the standardized mixed meal began.

#### *Standard Meal for Mixed Meal*

The standard (breakfast) meal was provided as a liquid nutrition drink (Boost®, Ensure®, or similar), with ~40 g carbohydrate and ~240 calories per bottle (~8 ounces). The caloric composition of the meal was ~65% carbohydrate, ~15% protein, and ~20% fat. The amount given was 6 mL/kg body weight up to a maximum of 360 mL. Therefore, for patients  $\geq 60$  kg, the standard meal consisted of ~60 g carbohydrate and 360 calories. Efforts were made to provide the same mixed meal product for the baseline and week 24 standardized mixed meal.

Fasting plasma glucose (FPG) and other fasting blood samples were collected at time zero. Immediately after this, the patient was instructed to take the meal-time amount of bolus insulin appropriate for the carbohydrate content of the standard meal. Because the endpoint is 2-hour glucose change from time zero glucose, no additional high blood glucose correction (sliding scale) insulin was given at this meal. Patients were instructed to completely consume the meal within 15-20 minutes. Water or noncaffeinated, zero-calorie beverages were allowed ad libitum. No other food could be consumed until the 2-hour PPG sample was collected. If the patient was unable to consume at least 50% of the standard meal at baseline, the standardized mixed meal was not completed, and the subsequent 24-week standardized mixed meal was not be performed. If the patient consumed  $>50\%$  of the standardized mixed meal, the approximate amount was recorded and an equivalent amount consumed at the subsequent, 24-week standardized mixed meal.

Staff at study centers received the following instructions for the standardized mixed meal:

#### Baseline Visit (Day 1)

1. Record the amount and brand name of the standard meal liquid nutrition drink the patient is instructed to consume in the source documents.
2. Fasting blood samples are obtained, including FPG.
3. Record the time of blood sample collection in the source documents.
4. Immediately after the fasting blood samples are collected, the patient takes the meal-time amount of bolus insulin appropriate for the carbohydrate content of the standard meal. Because the endpoint is glucose change from time zero glucose, no additional “high blood glucose correction” (sliding scale) insulin should be given at this meal. The amount of insulin and time of administration are recorded in

## SUPPLEMENTARY DATA

the source documents.

5. 15 minutes after the bolus insulin is administered, the patient starts consuming the standard meal.
6. Record the time the meal ingestion starts in the source documents.
7. The 2-hour countdown for the 2-hour plasma PPG starts immediately after the patient begins ingestion of the standard meal.
8. The patient is instructed to ingest the prescribed amount of the standard meal within 15 to 20 minutes.
9. Record the time ingestion is completed, measure the portion of the meal not ingested (if any) and record the assessed percent of prescribed amount ingested in the source documents.
10. No blood samples for PK are collected at this visit.
11. 2-hours after the meal ingestion starts, the 2-hour plasma PPG is collected.
12. Record the time the 2-hour plasma PPG is collected in the source documents.
13. Double-blind study drug is administered AFTER the blood sample is drawn at 120 minutes.
14. Record the time the double-blind study drug is administered in the source documents

### Week 24 Visit

1. Record the amount and brand name of the standard meal liquid nutrition drink the patient is instructed to consume in the source documents.
2. Fasting blood samples are obtained, including FPG and PK samples.
3. Record the time of blood sample collection in the source documents.
4. Immediately after the fasting blood samples are collected, the patient takes the meal-time amount of bolus insulin appropriate for the carbohydrate content of the standard meal. Because the endpoint is glucose change from time zero glucose, no additional “high blood glucose correction” (sliding scale) insulin should be given at this meal. The amount of insulin and time of administration are recorded in the source documents.
5. Double-blind study drug is administered immediately AFTER the bolus insulin is administered.
6. Record the time the double-blind study drug is administered in the source documents.
7. 15 minutes after the meal-time insulin was administered, the patient starts consuming the standard meal.
8. Record the time the meal ingestion starts in the source documents.
9. The 2-hour countdown for the 2-hour PPG starts immediately after the patient begins ingestion of the standard meal.
10. The patient is instructed to ingest the prescribed amount of the standard meal within 15 to 20 minutes.
11. Record the time ingestion is completed, measure the portion of the meal not ingested (if any) and record the assessed percent of prescribed amount ingested in the source documents.
12. 2-hours after the meal ingestion starts, the 2-hour postprandial plasma glucose and PK samples are collected.
13. Record the time the 2-hour postprandial blood samples are collected in the source documents.

### References

1. Greenbaum CJ, Mandrup-Poulson T, McGee PF, et al. Mixed-meal tolerance test versus glucagon stimulation test for the assessment of beta-cell function in therapeutic trials in type 1 diabetes. *Diabetes Care*. 2008;31:1966-1971.
2. Lane JD, Barkauskas CE, Surwitt RS, Feinglos MN. Caffeine impairs glucose metabolism in type 2 diabetes. *Diabetes Care* 2004; 27:2047-2048.

SUPPLEMENTARY DATA

**Ambulatory Glucose Profiles for Each Treatment Group**

**Supplementary Figure S1.** Ambulatory glucose profiles (AGP) for each treatment group’s CGM data collected in the week prior to week 24 are summarized. Data from the modified intent to treat (mITT) population are presented for standard deviation (SD) and time above, below, and in the target range of 70-180 mg/dL (3.9-10.0 mmol/L), as these analyses were prespecified in the statistical analysis plan. Average glucose, estimated HbA<sub>1c</sub>, and interquartile range (IQR) were not prespecified and were calculated from CGM datasets collected for AGP analysis, which differed from the mITT dataset summarized in Table 2 of the main paper. *A:* Placebo. *B:* Sotagliflozin 200 mg. *C:* Sotagliflozin 400 mg.

**A. Placebo**

Ambulatory Glucose Profile (AGP)

| Avg Glucose<br>mg/dL | Estimated<br>HbA <sub>1c</sub> | SD<br>mg/dL         | IQR<br>mg/dL | Low<br>Below 70<br>mg/dL | In Target Range<br>70 - 180<br>mg/dL | High<br>Above 180<br>mg/dL |
|----------------------|--------------------------------|---------------------|--------------|--------------------------|--------------------------------------|----------------------------|
| <b>176.1</b>         | <b>7.8%</b>                    | <b>63.1</b>         | <b>110</b>   | <b>5.9%</b>              | <b>51.6%</b>                         | <b>42.6%</b>               |
| 88 - 116 *           | < 6 *                          | 10 - 26 *           | 13 - 29 *    | < 4 *                    | > 90 *                               | < 6 *                      |
| GLUCOSE EXPOSURE     |                                | GLUCOSE VARIABILITY |              | GLUCOSE RANGES           |                                      |                            |

\* Indicates reference ranges, which are derived from normal reference population means ± 2 standard deviations. The five curves below represent frequency distributions of glucose data plotted according to time without regard to date.

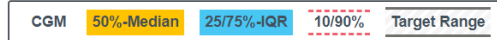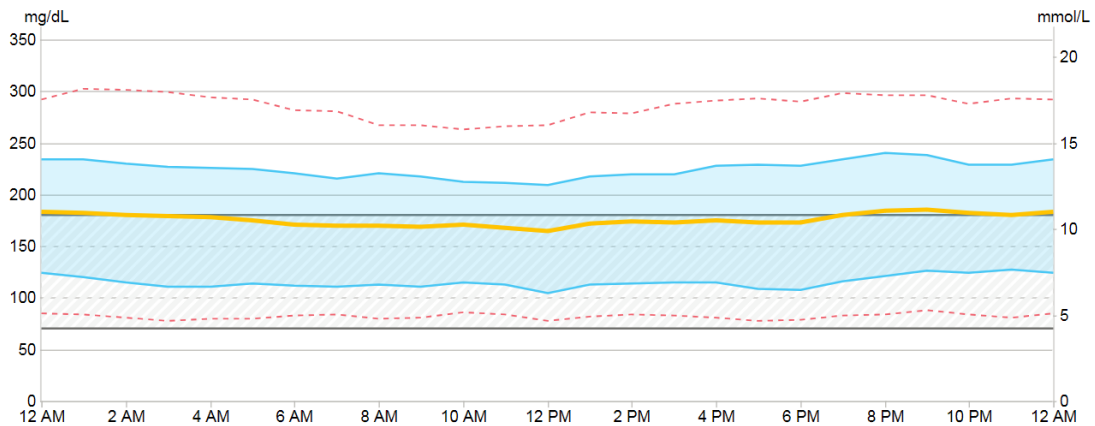

# SUPPLEMENTARY DATA

## B. Sotagliflozin 200 mg

Ambulatory Glucose Profile (AGP)

| Avg Glucose<br>mg/dL | Estimated<br>HbA1c | SD<br>mg/dL         | IQR<br>mg/dL | Low               | In Target Range<br>70 - 180<br>mg/dL | High               |
|----------------------|--------------------|---------------------|--------------|-------------------|--------------------------------------|--------------------|
| <b>166.4</b>         | <b>7.4%</b>        | <b>58.5</b>         | <b>95</b>    | Below 70<br>mg/dL | <b>57.8%</b>                         | Above 180<br>mg/dL |
| 88 - 116 *           | < 6 *              | 10 - 26 *           | 13 - 29 *    | <b>5.5%</b>       | > 90 *                               | <b>36.7%</b>       |
| GLUCOSE EXPOSURE     |                    | GLUCOSE VARIABILITY |              | GLUCOSE RANGES    |                                      | < 6 *              |

\* Indicates reference ranges, which are derived from normal reference population means  $\pm$  2 standard deviations. The five curves below represent frequency distributions of glucose data plotted according to time without regard to date.

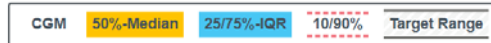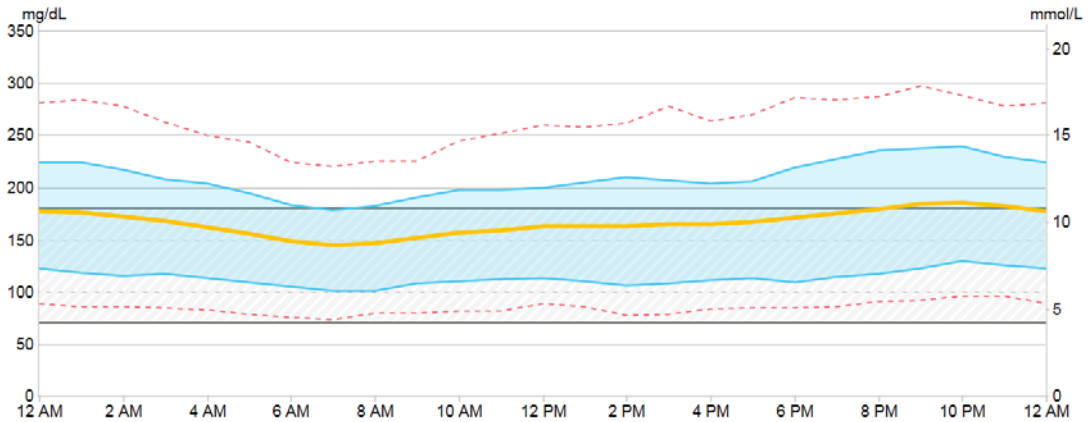

## C. Sotagliflozin 400 mg

Ambulatory Glucose Profile (AGP)

| Avg Glucose<br>mg/dL | Estimated<br>HbA1c | SD<br>mg/dL         | IQR<br>mg/dL | Low               | In Target Range<br>70 - 180<br>mg/dL | High               |
|----------------------|--------------------|---------------------|--------------|-------------------|--------------------------------------|--------------------|
| <b>156.7</b>         | <b>7.1%</b>        | <b>66.3</b>         | <b>84</b>    | Below 70<br>mg/dL | <b>64%</b>                           | Above 180<br>mg/dL |
| 88 - 116 *           | < 6 *              | 10 - 26 *           | 13 - 29 *    | <b>5.4%</b>       | > 90 *                               | <b>30.6%</b>       |
| GLUCOSE EXPOSURE     |                    | GLUCOSE VARIABILITY |              | GLUCOSE RANGES    |                                      | < 6 *              |

\* Indicates reference ranges, which are derived from normal reference population means  $\pm$  2 standard deviations. The five curves below represent frequency distributions of glucose data plotted according to time without regard to date.

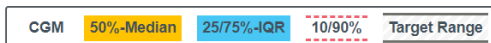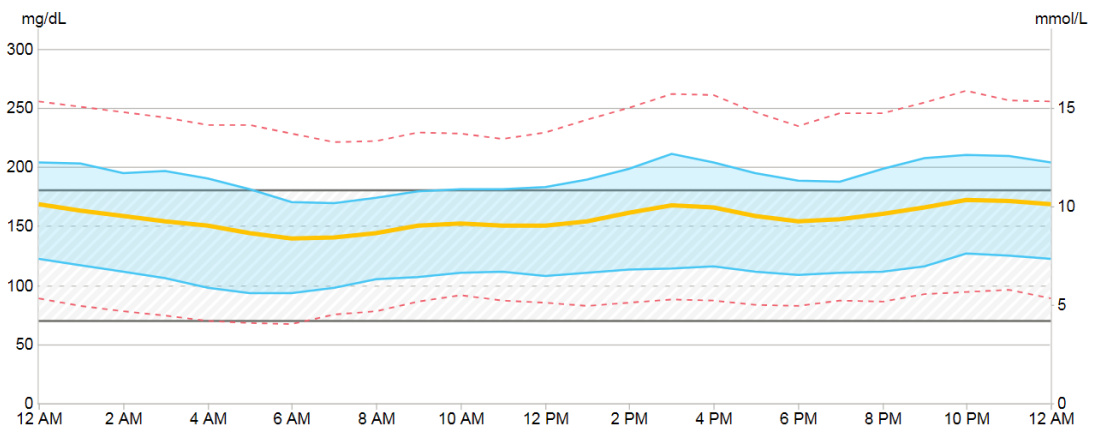



## SUPPLEMENTARY DATA

### **CGM Data from Patients with Similar HbA<sub>1c</sub> Values at Baseline**

The following figures show patient-specific CGM data for 1 patient in each treatment group (placebo, sotagliflozin 200 mg, and sotagliflozin 400 mg) with similar HbA<sub>1c</sub> values at baseline. Three CGM thresholds were selected: 6.5% (Figure 1), 7.0% (Figure 2), and 8.0% (Figure 3).

#### *Method for Patient Selection*

The baseline HbA<sub>1c</sub> was sorted lowest to highest. For each HbA<sub>1c</sub> threshold value, up to 3 patients (with baseline and week 24 CGM data) with the exact HbA<sub>1c</sub> value were selected. If the number of patients with the exact value was fewer than 2, then patients with HbA<sub>1c</sub> immediately above this value were selected until 2 patients total were at or above the HbA<sub>1c</sub> threshold. The patient with the largest improvement in percent time in range at week 24 compared to baseline was selected. If percent time in range (3.9-10 mmol/L [70-180 mg/dL]) at week 24 was improved by less than 5%, then the patient with the largest decrease in percent time below 3.9 mmol/L (70 mg/dL) was selected.

#### *Visualization Technology*

Individual patient and aggregate visualizations of CGM data were generated by Cenduit, LLC (Durham, NC) and any reproductions must acknowledge Cenduit, LLC.

SUPPLEMENTARY DATA

**Supplementary Figure S2.** Individual patient visualizations at HbA<sub>1c</sub> threshold of 6.5%. Visualizations provided are based on 1 week of data prior to baseline and the week 24 visit. BL, baseline. A: Placebo. B: Sotagliflozin 200 mg. C: Sotagliflozin 400 mg.

**A. 6.5% Threshold: Placebo Patient**

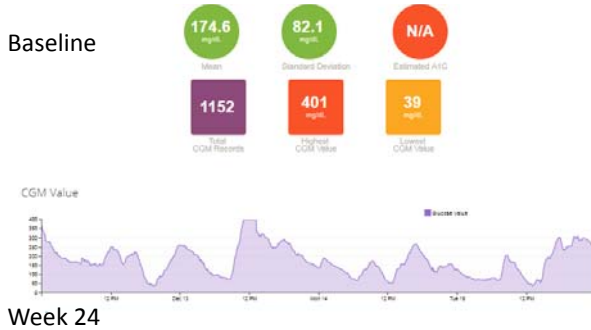

**% Time in CGM Ranges**

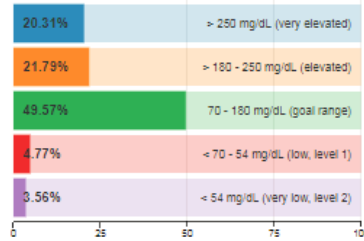

**Baseline**  
A1C=6.7%  
Insulin dose:  
Basal=23.5 IU/day  
Bolus=35.0 IU/day

**% Time in CGM Ranges**

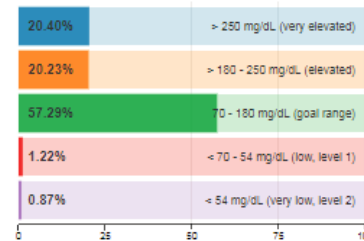

**Week 24**  
A1C=7.4%  
Insulin dose:  
Basal=23.5 IU/day  
Bolus=40.0 IU/day

**B. 6.5% Threshold: Sotagliflozin 200 mg Patient**

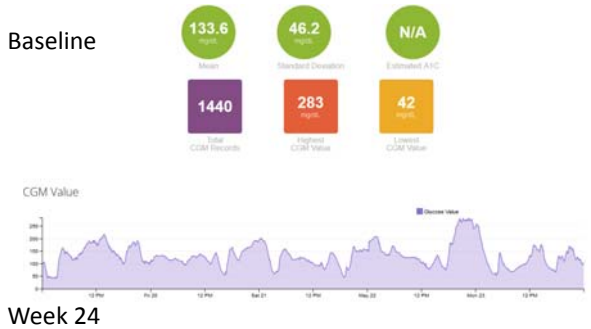

**% Time in CGM Ranges**

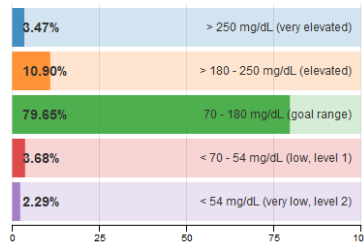

**Baseline**  
A1C=6.6%  
Insulin dose:  
Basal=44.0 IU/day  
Bolus=35.0 IU/day

**% Time in CGM Ranges**

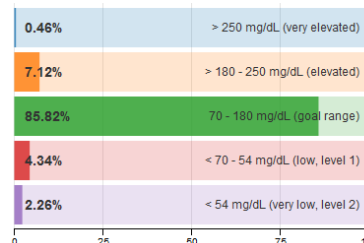

**Week 24**  
A1C=6.6%  
Insulin dose:  
Basal=30.0 IU/day  
Bolus=31.0 IU/day

SUPPLEMENTARY DATA

C. 6.5% Threshold: Sotagliflozin 400 mg Patient

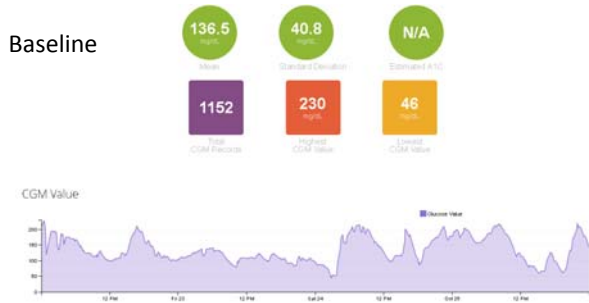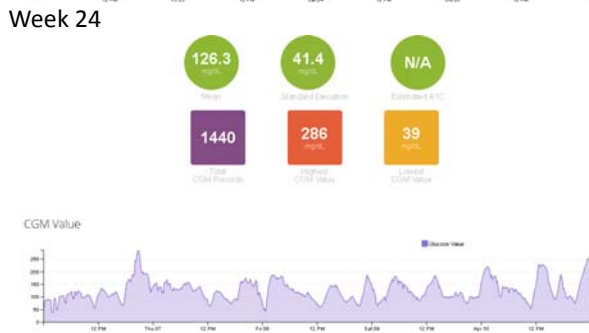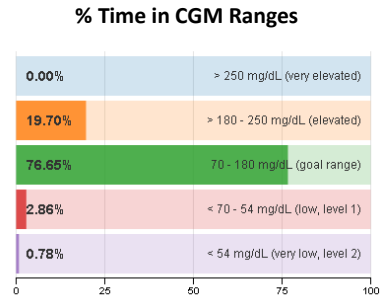

**Baseline**  
A1C=6.6%  
Insulin dose:  
Basal=25.4 IU/day  
Bolus=8.4 IU/day

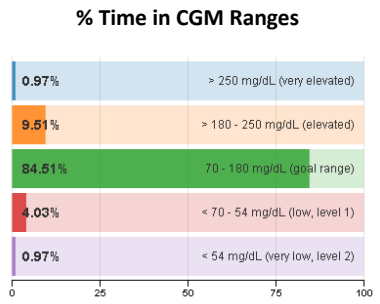

**Week 24**  
A1C=6.4%  
Insulin dose:  
Basal=26.4 IU/day  
Bolus=5.8 IU/day

SUPPLEMENTARY DATA

**Supplementary Figure S3.** Individual patient visualizations at HbA<sub>1c</sub> threshold of 7.0%. Visualizations provided are based on 1 week of data prior to baseline and the week 24 visit. BL, baseline. A: Placebo. B: Sotagliflozin 200 mg. C: Sotagliflozin 400 mg.

**A. 7.0% Threshold: Placebo Patient**

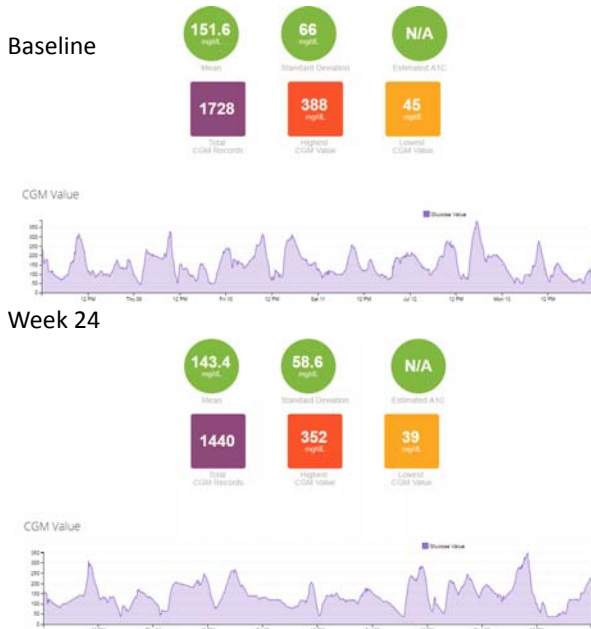

**% Time in CGM Ranges**

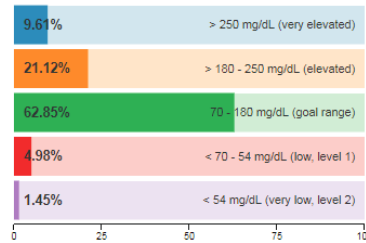

**Baseline**  
 A1C=7.1%  
 Insulin dose:  
 Basal=15.0 IU/day  
 Bolus=13.0 IU/day

**% Time in CGM Ranges**

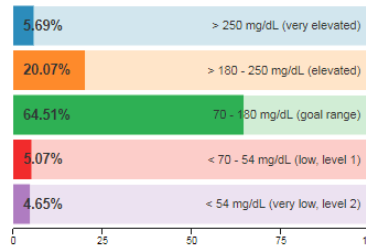

**Week 24**  
 A1C=6.8%  
 Insulin dose:  
 Basal=19.0 IU/day  
 Bolus=14.5 IU/day

**B. 7.0% Threshold: Sotagliflozin 200 mg Patient**

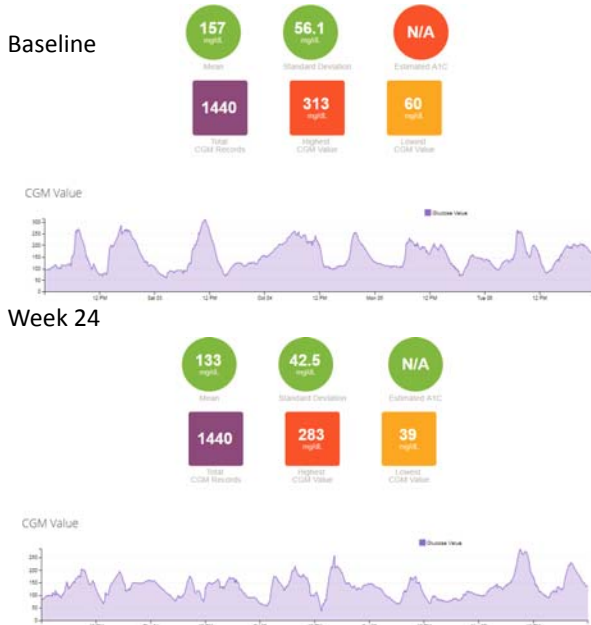

**% Time in CGM Ranges**

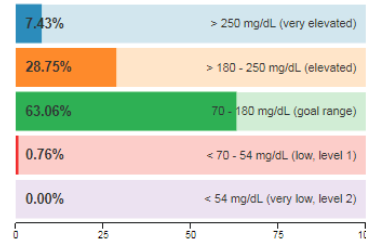

**Baseline**  
 A1C=7.1%  
 Insulin dose:  
 Basal=25.7 IU/day  
 Bolus=28.4 IU/day

**% Time in CGM Ranges**

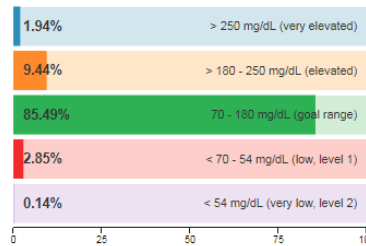

**Week 24**  
 A1C=6.3%  
 Insulin dose:  
 Basal=25.7 IU/day  
 Bolus=24.5 IU/day

SUPPLEMENTARY DATA

C. 7.0% Threshold: Sotagliflozin 400 mg Patient

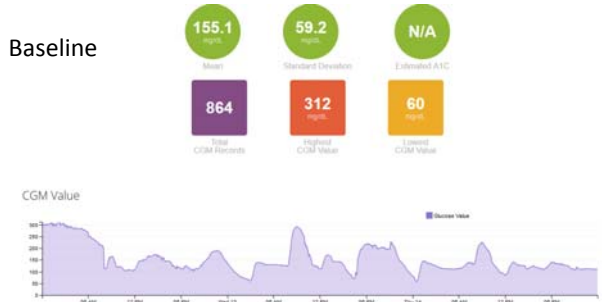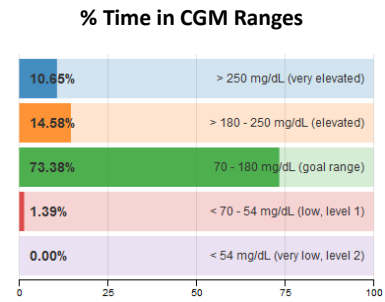

**Baseline**  
A1C=7.0%  
Insulin dose:  
Basal=26.0 IU/day  
Bolus=35.6 IU/day

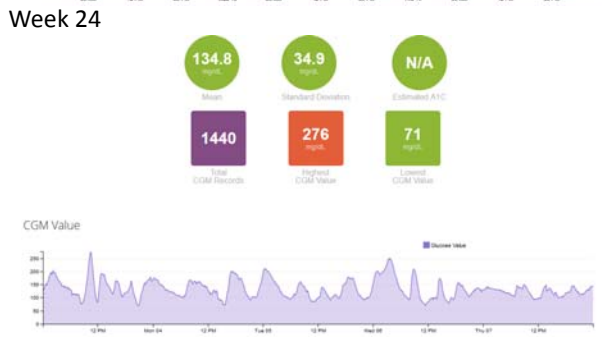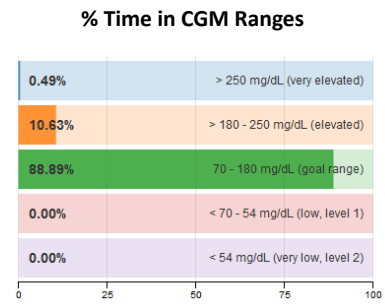

**Week 24**  
A1C=6.6%  
Insulin dose:  
Basal=21.5 IU/day  
Bolus=29.4 IU/day

SUPPLEMENTARY DATA

**Supplementary Figure S4.** Individual patient visualizations at HbA<sub>1c</sub> threshold of 8.0%. Visualizations provided are based on 1 week of data prior to baseline and the week 24 visit. BL, baseline. A: Placebo. B: Sotagliflozin 200 mg. C: Sotagliflozin 400 mg.

**A. 8.0% Threshold: Placebo Patient**

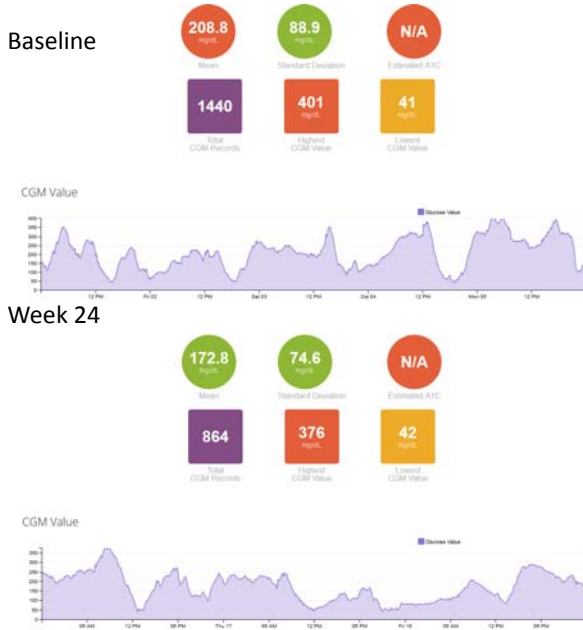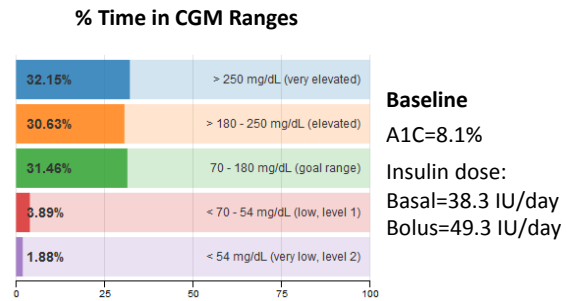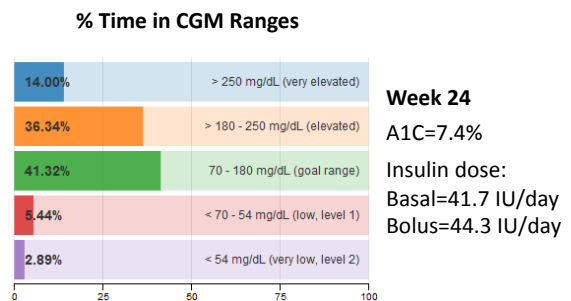

**B. 8.0% Threshold: Sotagliflozin 200 mg Patient**

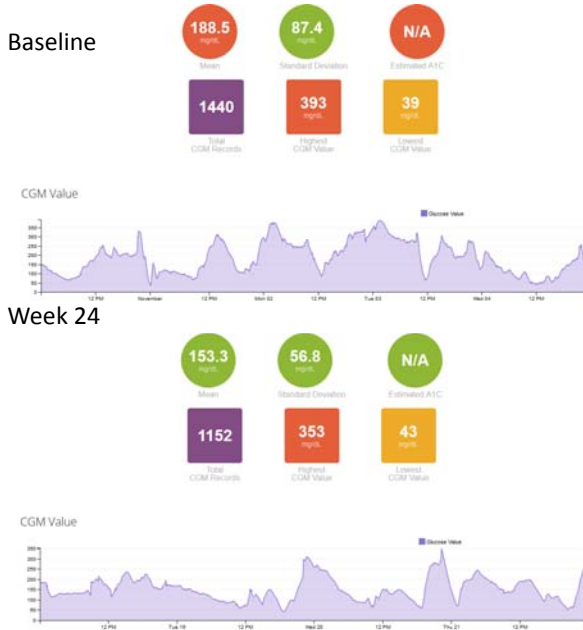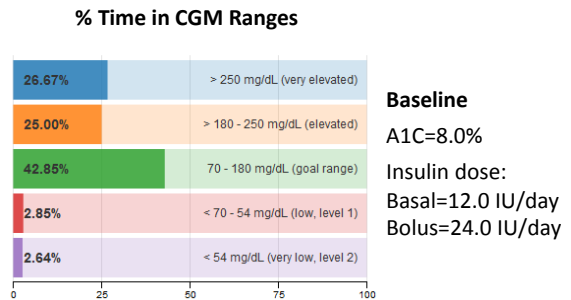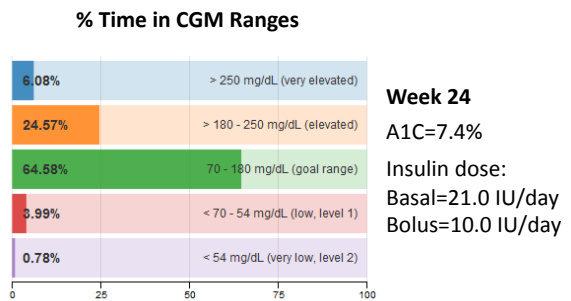

SUPPLEMENTARY DATA

C. 8.0% Threshold: Sotagliflozin 400 mg Patient

Baseline

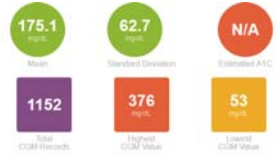

CGM Value

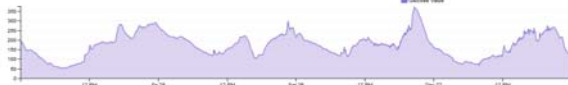

Week 24

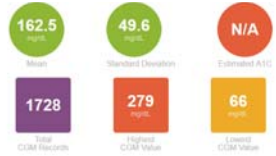

CGM Value

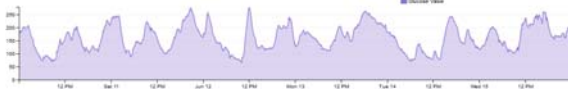

% Time in CGM Ranges

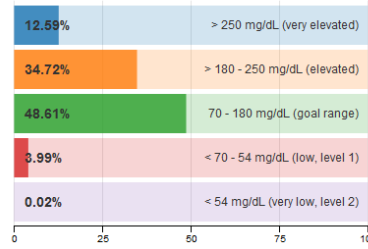

**Baseline**  
 A1C=8.0%  
 Insulin dose:  
 Basal=21.0 IU/day  
 Bolus=14.0 IU/day

% Time in CGM Ranges

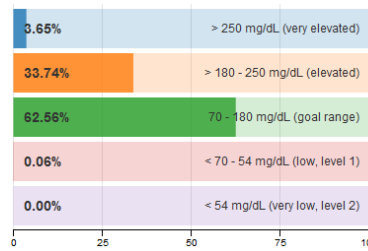

**Week 24**  
 A1C=6.8%  
 Insulin dose:  
 Basal=19.0 IU/day  
 Bolus=10.0 IU/day
